# Supplementary material for: The GlnR Regulon in Streptococcus mutans Is Differentially Regulated by GlnR and PmrA
Source: PubMed Central journal article supplement (PMC4959772; doi:10.1371/journal.pone.0159599), 2016-07-25
Supplement: pone.0159599.s003.pdf [file pone.0159599.s003.pdf]

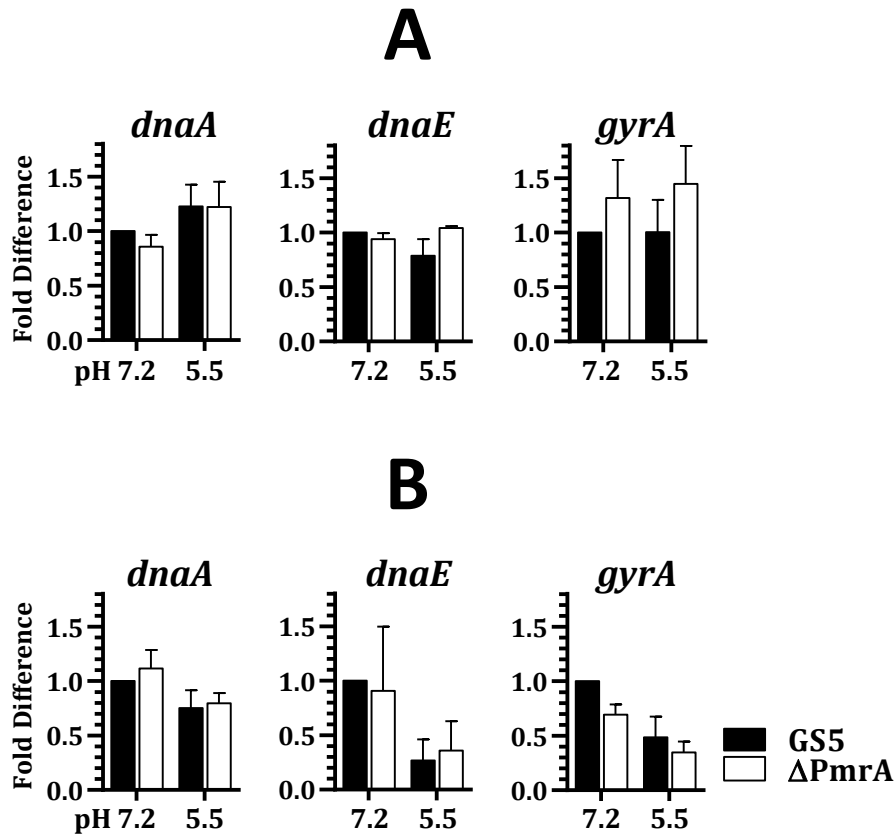

**S3 Fig. The expression of *dnaA*, *dnaE*, and *gyrA* is not regulated by PmrA.** Total cellular RNA was isolated from wild-type GS5 and strain  $\Delta$ PmrA grown in chemostat in TY containing 20 mM (A) or 100 mM glucose (B) at pH 7.2 or pH 5.5. The relative quantity of mRNA of *dnaA*, *dnaE*, and *gyrA* was measured by qPCR. The change in  $\Delta Cq$  of each sample was normalized with 16S RNA. The  $\Delta Cq$  derived from wild-type GS5 grown at pH 7.2 was used as the reference. Numbers are the mean and standard deviation of three samples.
