# Supplementary material for: The GlnR Regulon in Streptococcus mutans Is Differentially Regulated by GlnR and PmrA
Source: PubMed Central journal article supplement (PMC4959772; doi:10.1371/journal.pone.0159599), 2016-07-25
Supplement: pone.0159599.s004.pdf [file pone.0159599.s004.pdf]

S1 Table. Primers used in this study.

| Primer       | Sequence <sup>a</sup>                     | Purpose                                                |
|--------------|-------------------------------------------|--------------------------------------------------------|
| glnRA_969F   | GGGTGGAGGTGCAAGCATG                       | construction of $\Delta$ GlnR and GlnR+/ $\Delta$ GlnR |
| glnRA_2033R  | TTTCTCGAGTTTCCTCCTTTCATTGTC               | construction of $\Delta$ GlnR                          |
| glnRA_2389F  | TACGCATGCAAATACGTAACGTGGAATT              |                                                        |
| glnRA_3403R  | GGTGAACGATTGCGTCCCG                       | construction of $\Delta$ GlnR and GlnR+/ $\Delta$ GlnR |
| glnR_C_1945R | GACGCATGCTAAACTTTACTTTTTGTAAAAAATTTTCG    | construction of GlnR+/ $\Delta$ GlnR                   |
| glnR_C_1946F | CTCCTGCAGGAGTTTATGTCAGGAAATATGACAT        |                                                        |
| pmrA_3574F   | CATGCCAATCACACCTAAAGC                     | construction of $\Delta$ PmrA and PmrA+/ $\Delta$ PmrA |
| pmrA_4544R   | AATGGATCCGAATAATCTTCGTTTCTT               | construction of $\Delta$ PmrA                          |
| pmrA_4827F   | GGA <del>CT</del> CGAGGCCATTGAATTCTGAAGAC |                                                        |
| pmrA_5860R   | CTGGCAGCAGGTTTTCAAGG                      | construction of $\Delta$ PmrA and PmrA+/ $\Delta$ PmrA |
| pmrA_C_4860R | CTTGCATGCTTATTTGTCTTCAGAATTCAATGGCC       | construction of PmrA+/ $\Delta$ PmrA                   |
| pmrA_C_4861F | CACCTGCAGAAAAGAGTGGAACACTTTGGTTC          |                                                        |
| qPCR_16s_F   | TGGAATCCATGTGTAGCGG                       | qPCR of 16s RNA                                        |
| qPCR_16s_R   | CCTGCCCGGGAACGTATTC                       |                                                        |
| qPCR_citB_F  | TCAATTCTTACGGTAGCCGTCG                    | qPCR of <i>citB</i>                                    |
| qPCR_citB_R  | TTTACGCACAACCATTGG                        |                                                        |
| qPCR_gdhA_F  | CTCTTACTGGCCAACCAATC                      | qPCR of <i>gdhA</i>                                    |
| qPCR_gdhA_R  | CACCACCTGCAGGTGTGAA                       |                                                        |
| qPCR_glnA_F  | TGTTGAAATCCCAGCTAC                        | qPCR of <i>glnA</i>                                    |
| qPCR_glnA_R  | CAGTTGGATTCATGATAGC                       |                                                        |
| qPCR_glnP_F  | CTGGCGATTCCATGTACAAC                      | qPCR of <i>glnP</i>                                    |
| qPCR_glnP_R  | CGACATTGCTTCCTTTAC                        |                                                        |
| qPCR_glnQ_F  | CTACCATGCACTTCGTAA                        | qPCR of <i>glnQ</i>                                    |
| qPCR_glnQ_R  | AGA <del>ACT</del> GTTGAGCTCGTG           |                                                        |
| qPCR_nrgA_F  | TCGCGATTATGACCGTC                         | qPCR of <i>nrgA</i>                                    |
| qPCR_nrgA_R  | CCCATAAAGGTTGGATAC                        |                                                        |

|                 |                                              |                                                              |
|-----------------|----------------------------------------------|--------------------------------------------------------------|
| MBP_glnR_F      | <u>GGGAATTC</u> ATGAAAGAAAAAGAGCTTCGAC       | construction of MBP-                                         |
| MBP_glnR_R      | GTT <u>CTGCAG</u> TTACATACGTAAACCACCAAGA     | GlnR                                                         |
| MBP_pmrA_F      | <u>CTGGATCC</u> ATGGAAAAAGAAACGAAGATT        | construction of MBP-                                         |
| MBP_pmrA_R      | CAC <u>CTGCAG</u> TTATTTGTCTTCAGAATTC AAT    | PmrA                                                         |
| EMSA_citB_F     | CTATTTTTATGTTATAAAACATAACATAAAATGCAAGCTT     | EMSA probes                                                  |
| EMSA_citB_R     | AAGCTTGCATTTTTATGTTATGTTTTATAACATAAAAATAG    |                                                              |
| EMSA_gdhA_F     | TTAATCTAATGAATGTTATTTTTTATAACATGAAAGAATA     |                                                              |
| EMSA_gdhA_R     | TATTCCTTCATGTTATAAAAAATAACATTCATTAGATTAA     |                                                              |
| EMSA_glnP_F     | TATAGACTGTTATGTAAGGAAATATAACATCTATTATTAA     |                                                              |
| EMSA_glnP_R     | TTAATAATAGATGTTATATTTTCCTTACATAACAGTCTATA    |                                                              |
| EMSA_glnQ_F     | GTATAACAATATAATGTTAGAAAAGCTAACAATAAATTTA     |                                                              |
| EMSA_glnQ_R     | TAAATTTATGTTAGCTTTTCTAACATTATATTGTTATAC      |                                                              |
| EMSA_glnR_F     | GTTTAGAGTTTATGTCAGGAAATATGACATATAGGCTTGA     |                                                              |
| EMSA_glnR_R     | TCAAGCCTATATGTCATATTTCTGACATAAACTCTAAAC      |                                                              |
| EMSA_nrgA-1_F   | TACCTCCCTTTATGTTATATAATATAACATTATTCCTAAA     |                                                              |
| EMSA_nrgA-1_R   | TTTAGGAATAATGTTATATTATATAACATAAAGGGAGGTA     |                                                              |
| EMSA_nrgA-2_F   | CTTTTTTGTTATATGTTATGTTTTTTAACATTTCTATCTA     |                                                              |
| EMSA_nrgA-2_R   | TAGATAGAAATGTTAAAAAACATAACATATAACAAAAAA<br>G |                                                              |
| EMSA_pmrA_F     | TAAACATTTTATGTAGAAAACTACATTTATTGTAATATA      |                                                              |
| EMSA_pmrA_R     | TATATTACAATAAATGTAGTTTTTCTACATAAAATGTTTA     |                                                              |
| EMSA_gdhA_Con_F | TTAATCTAATGAACAattTTTTTTAAtctatTGAAAGAATA    | EMSA control probes<br>with mutated bases in<br>the GlnR box |
| EMSA_gdhA_Con_R | TATTCCTTTCaAtagaTAAAAAaattgTTCATTAGATTAA     |                                                              |
| EMSA_glnQ_Con_F | GTATAACAATATAAAtgatGAAAAGCattagATAAATTTA     |                                                              |
| EMSA_glnQ_Con_R | TAAATTTATctaatGCTTTTCatcaaTTATATTGTTATAC     |                                                              |
| EMSA_glnR_Con_F | GTTTAGAGTTTAccattGGAAATActtctTATAGGCTTGA     |                                                              |
| EMSA_glnR_Con_R | TCAAGCCTATAagaagTATTTCCaatggTAAACTCTAAAC     |                                                              |

<sup>a</sup> Inserted restriction sites are underlined. The mutated bases in the GlnR box are in lower case.

CTCGAG, the XhoI recognition sequence; GCATGC, the SphI recognition sequence; CTGCAG, the PstI recognition sequence; GGATCC, the BamHI recognition sequence; GAATTC, the EcoRI recognition sequence.
